# Supplementary material for: Factors Influencing Changes in Food Preparation during the COVID-19 Pandemic and Associations with Food Intake among Japanese Adults
Source: MDPI journal article supplement (doi:10.3390/nu13113864), 2021-10-28
Supplement: s1 [file s1]

**Table S1. Dietary Consciousness Scale**

| No.                                                | Scale items                                                                                                                            | Cronbach's alpha if item deleted |
|----------------------------------------------------|----------------------------------------------------------------------------------------------------------------------------------------|----------------------------------|
| <b>Importance of diet</b> (Cronbach alpha = 0.838) |                                                                                                                                        |                                  |
| 1                                                  | I am interested in information regarding eating habits.                                                                                | 0.810                            |
| 2                                                  | I have a higher interest in and awareness of healthy dietary habits than others.                                                       | 0.804                            |
| 3                                                  | I want to prioritize my eating habits.                                                                                                 | 0.814                            |
| 4                                                  | I think I should devote a lot of time to my eating habits.                                                                             | 0.817                            |
| 5                                                  | I think that I should invest money in my diet.                                                                                         | 0.826                            |
| 6                                                  | I endeavor to maintain a nutritional balance.                                                                                          | 0.824                            |
| 7                                                  | I want to know how to maintain nutritional balance.                                                                                    | 0.814                            |
| <b>Precedence of diet</b> (Cronbach alpha = 0.734) |                                                                                                                                        |                                  |
| 1                                                  | Rather than preventing illnesses through eating habits, I think it is better to treat or think about illnesses only when they occur. # | 0.699                            |
| 2                                                  | I do not worry about my eating habits unless I or someone close to me experiences a diet-related problem. #                            | 0.672                            |
| 3                                                  | I value work or income more than having a healthy diet. #                                                                              | 0.702                            |
| 4                                                  | I value play and hobbies more than my eating habits. #                                                                                 | 0.694                            |
| 5                                                  | I cannot afford to be mindful regarding my eating habits. #                                                                            | 0.672                            |

Cronbach's alpha for the entire scale = 0.828

# reverse items

**Table S2.** Comparison of cooking frequency across the three groups that are based on changes in cooking time and efforts by genders.

| Cooking frequency in COVID-19     | Changes in cooking time and effort compared to before COVID-19 |      |           |      |           |      | <i>p</i> <sup>*1</sup> |
|-----------------------------------|----------------------------------------------------------------|------|-----------|------|-----------|------|------------------------|
|                                   | Increased                                                      |      | Decreased |      | No change |      |                        |
|                                   | n                                                              | %    | n         | %    | n         | %    |                        |
| Males (n = 1,104)                 | (n=229)                                                        |      | (n=80)    |      | (n=795)   |      |                        |
| almost every day                  | 62                                                             | 27.1 | 12*       | 15.0 | 196       | 24.7 | <0.001                 |
| 4-5 times a week                  | 43**                                                           | 18.8 | 8         | 10.0 | 83*       | 10.4 |                        |
| 2-3 times a week                  | 74**                                                           | 32.3 | 29**      | 36.3 | 166*      | 20.9 |                        |
| less than or equal to once a week | 50*                                                            | 21.8 | 31        | 38.8 | 350**     | 44.0 |                        |
| Females (n = 1,181)               | (n=334)                                                        |      | (n=86)    |      | (n=761)   |      |                        |
| almost every day                  | 227                                                            | 68.0 | 43*       | 50.0 | 539**     | 70.8 | <0.001                 |
| 4-5 times a week                  | 54**                                                           | 16.2 | 16        | 18.6 | 84*       | 11.0 |                        |
| 2-3 times a week                  | 39                                                             | 11.7 | 20**      | 23.3 | 83        | 10.9 |                        |
| less than or equal to once a week | 14*                                                            | 4.2  | 7         | 8.1  | 55        | 7.2  |                        |

\*1 Chi-square tests

\*\*Adjusted residual  $\geq 1.96$

\* Adjusted residual  $\leq -1.96$

**Table S3. Comparison of dietary attitudes, behaviors and other lifestyle factors across the three groups that are based on changes in cooking time and efforts and between genders.**

|                                                                 |                                                           | Male (n=1,104)       |      |                      |      |                        |       |                        | Female (n=1,181)     |      |                      |      |                        |      |                        |
|-----------------------------------------------------------------|-----------------------------------------------------------|----------------------|------|----------------------|------|------------------------|-------|------------------------|----------------------|------|----------------------|------|------------------------|------|------------------------|
|                                                                 |                                                           | Increased<br>(n=563) |      | Decreased<br>(n=166) |      | No change<br>(n=1,556) |       | <i>p</i> <sup>*†</sup> | Increased<br>(n=563) |      | Decreased<br>(n=166) |      | No change<br>(n=1,556) |      | <i>p</i> <sup>*†</sup> |
|                                                                 |                                                           | n                    | %    | n                    | %    | n                      | %     |                        | n                    | %    | n                    | %    | n                      | %    |                        |
| <b>Dietary Consciousness Scale</b>                              |                                                           |                      |      |                      |      |                        |       |                        |                      |      |                      |      |                        |      |                        |
| Importance of diet <sup>*2</sup>                                | High score group                                          | 155**                | 67.7 | 42                   | 52.5 | 322*                   | 40.5  | <0.001                 | 234**                | 70.1 | 37*                  | 43.0 | 401*                   | 52.7 | <0.001                 |
|                                                                 | Low score group                                           | 74*                  | 32.3 | 38                   | 47.5 | 473**                  | 59.5  |                        | 100*                 | 29.9 | 49**                 | 57.0 | 360**                  | 47.3 |                        |
| Precedence of diet <sup>*2</sup>                                | High score group                                          | 114                  | 49.8 | 24*                  | 30   | 419**                  | 52.7  | <0.001                 | 251**                | 75.1 | 49*                  | 57.0 | 528                    | 69.4 | 0.003                  |
|                                                                 | Low score group                                           | 115                  | 50.2 | 56**                 | 70   | 376*                   | 47.3  |                        | 83*                  | 24.9 | 37**                 | 43.0 | 233                    | 30.6 |                        |
| Changes in the importance of diet due to COVID-19 <sup>*3</sup> | Improved                                                  | 166**                | 72.5 | 36                   | 45   | 255*                   | 32.1  | <0.001                 | 241**                | 72.2 | 45                   | 52.3 | 316**                  | 41.5 | <0.001                 |
|                                                                 | Worsened                                                  | 16                   | 7    | 25**                 | 31.3 | 49*                    | 6.2   |                        | 17                   | 5.1  | 18**                 | 20.9 | 23*                    | 3.0  |                        |
|                                                                 | No change                                                 | 47*                  | 20.5 | 19*                  | 23.8 | 491**                  | 61.8  |                        | 76*                  | 22.8 | 23*                  | 26.7 | 422**                  | 55.5 |                        |
| Changes in the precedence of diet due to COVID-19 <sup>*3</sup> | Improved                                                  | 87**                 | 38   | 31**                 | 38.8 | 181*                   | 22.8  | <0.001                 | 173**                | 51.8 | 37**                 | 43.0 | 184*                   | 24.2 | <0.001                 |
|                                                                 | Worsened                                                  | 57**                 | 24.9 | 25**                 | 31.3 | 99*                    | 12.5  |                        | 44                   | 13.2 | 23**                 | 26.7 | 74*                    | 9.7  |                        |
|                                                                 | No change                                                 | 85*                  | 37.1 | 24*                  | 30   | 515**                  | 64.8  |                        | 117*                 | 35.0 | 25*                  | 30.2 | 503**                  | 66.1 |                        |
| <b>Dietary behaviors</b>                                        |                                                           |                      |      |                      |      |                        |       |                        |                      |      |                      |      |                        |      |                        |
| Usual cooking practices                                         | Prepare meals by cooking most things from raw ingredients | 72**                 | 31.4 | 11*                  | 13.8 | 182                    | 22.9  | <0.001                 | 179**                | 53.6 | 23*                  | 26.7 | 376                    | 49.4 | <0.001                 |
|                                                                 | Prepare meals by combining some commercial foods          | 111**                | 48.5 | 31                   | 38.8 | 315                    | 39.6  |                        | 135                  | 40.4 | 38                   | 44.2 | 295                    | 38.8 |                        |
|                                                                 | Prepare meals by combining many commercial foods          | 36*                  | 15.7 | 28**                 | 35   | 187                    | 23.5  |                        | 19*                  | 5.7  | 21**                 | 24.4 | 66                     | 8.7  |                        |
|                                                                 | Prepare meals by using commercial foods for everything    | 10*                  | 4.4  | 10                   | 12.5 | 111**                  | 14.00 |                        | 1*                   | 0.3  | 4                    | 4.7  | 24**                   | 3.2  |                        |
| Frequency of eating out                                         | more than 4 times a week                                  | 26                   | 11.4 | 16**                 | 20.0 | 71*                    | 8.9   | <0.001                 | 10                   | 3.0  | 6                    | 7.0  | 10                     | 1.3  | 0.074                  |
|                                                                 | 2-3 times a week                                          | 32                   | 14.0 | 21**                 | 26.3 | 87*                    | 10.9  |                        | 19                   | 5.7  | 6                    | 7.0  | 44                     | 5.8  |                        |
|                                                                 | once a week                                               | 27                   | 11.8 | 13                   | 16.3 | 105                    | 13.2  |                        | 44                   | 13.2 | 12                   | 14.0 | 90                     | 11.8 |                        |
|                                                                 | less than once a week                                     | 85                   | 37.1 | 20*                  | 25.0 | 301                    | 37.9  |                        | 140                  | 41.9 | 33                   | 38.4 | 336                    | 44.2 |                        |
|                                                                 | none                                                      | 59                   | 25.8 | 10*                  | 12.5 | 231**                  | 29.1  |                        | 121                  | 36.2 | 29                   | 33.7 | 281                    | 36.9 |                        |
| Frequency of take-out                                           | more than 4 times a week                                  | 24                   | 10.5 | 16**                 | 20.0 | 71*                    | 8.9   | <0.001                 | 10                   | 3.0  | 5                    | 5.8  | 18                     | 2.4  | <0.001                 |
|                                                                 | 2-3 times a week                                          | 53**                 | 23.1 | 18                   | 22.5 | 124*                   | 15.6  |                        | 31                   | 9.3  | 21**                 | 24.4 | 66*                    | 8.7  |                        |
|                                                                 | once a week                                               | 40                   | 17.5 | 19                   | 23.8 | 130                    | 16.4  |                        | 55                   | 16.5 | 13                   | 15.1 | 91*                    | 12.0 |                        |
|                                                                 | less than once a week                                     | 66                   | 28.8 | 19                   | 23.8 | 273**                  | 34.3  |                        | 141                  | 42.2 | 28*                  | 32.6 | 350                    | 46.0 |                        |
|                                                                 | none                                                      | 46                   | 20.1 | 8*                   | 10.0 | 197**                  | 24.8  |                        | 97                   | 29.0 | 19                   | 22.1 | 236                    | 31.0 |                        |
| <b>Lifestyle variables</b>                                      |                                                           |                      |      |                      |      |                        |       |                        |                      |      |                      |      |                        |      |                        |
| Daily physical activity greater or equal to one hour            | Yes                                                       | 132**                | 57.6 | 35                   | 43.8 | 336*                   | 42.3  | <0.001                 | 158                  | 47.3 | 35                   | 40.7 | 325                    | 42.7 | 0.306                  |
|                                                                 | No                                                        | 97*                  | 42.4 | 45                   | 56.3 | 459**                  | 57.7  |                        | 176                  | 52.7 | 51                   | 59.3 | 436                    | 57.3 |                        |
| Exercise greater or equal to 30 minutes more than twice a week  | Yes                                                       | 116**                | 50.7 | 26                   | 32.5 | 285*                   | 35.8  | <0.001                 | 94                   | 28.1 | 17                   | 19.8 | 202                    | 26.5 | 0.292                  |
|                                                                 | No                                                        | 113*                 | 49.3 | 54                   | 67.5 | 510**                  | 64.2  |                        | 240                  | 71.9 | 69                   | 80.2 | 559                    | 73.5 |                        |

|                                                                             |           |      |      |      |      |       |      |        |       |      |    |      |       |      |        |
|-----------------------------------------------------------------------------|-----------|------|------|------|------|-------|------|--------|-------|------|----|------|-------|------|--------|
| Changes in physical activity or exercise habits compared to before COVID-19 | Increased | 67** | 29.3 | 12   | 15.0 | 51*   | 6.4  | <0.001 | 52**  | 15.6 | 8* | 9.3  | 66*   | 8.7  | <0.001 |
|                                                                             | Decreased | 81** | 35.4 | 35** | 43.8 | 172*  | 21.6 |        | 155** | 46.4 | 30 | 34.9 | 191*  | 25.1 |        |
|                                                                             | No change | 81*  | 35.4 | 33*  | 41.3 | 572** | 71.9 |        | 127*  | 38.0 | 48 | 55.8 | 504** | 66.2 |        |
| Smoking                                                                     | Yes       | 75   | 32.8 | 28   | 35.0 | 204*  | 25.7 | 0.036  | 33    | 9.9  | 11 | 12.8 | 87    | 11.4 | 0.658  |
|                                                                             | No        | 154  | 67.2 | 52   | 65.0 | 591** | 74.3 |        | 301   | 90.1 | 75 | 87.2 | 674   | 88.6 |        |

\*<sup>1</sup> Chi-square tests

\*<sup>2</sup> The importance diet as well as the precedence of diet were defined as above the median for the high score group and below the median for the low score group. The median scores were 20 for the importance of diet and 14 for the precedence of diet, respectively.

\*<sup>3</sup> Changes in the Dietary Consciousness were calculated as a total score based on answers for each item of the Dietary Consciousness Scale as follows: no change (0 point), improved (+ 1 point), and worsening (− 1 point). After calculating the total score for each subscale, those who scored more than or equal to +1 point were grouped in "improved", those who scored less than or equal to -1 point were grouped in "worsened", and those who scored 0 point were grouped in "no change."

\*\*Adjusted residual  $\geq 1.96$

\* Adjusted residual  $\leq -1.96$
